# Supplementary material
Source: publisher figshare collection journal article supplement (https://acs.figshare.com/ndownloader/files/5705799)
Supplement: Supplementary file 1 [file 5705799]

# ic960995f.cif


audit_creation_date                ?
audit_creation_method          'PARSTCIF'

publ_contact_author

    Prof. Renata Dreos
    Dipartimento di Scienze Chimiche
    Universit\`a degli Studi di Trieste
    Via L. Giorgieri, 1
    I-34127 Trieste
    Italy   

publ_contact_letter

    Date September 24,1996

      

    Re: Manuscript IC960995F
        Title: A New Dinuclear Complex Derived from Cobaloxime Units Held 
               Together by a Pyridine-Boronic Acid  

    
     Attached you will find crystallographic data in the CIF 
     format of the above manuscript IC960995F 
     submitted for publication in Inorganic Chemistry

                                  Yours Sincerely
                                  Prof. Renata Dreos


publ_contact_author_phone        '                   '
publ_contact_author_fax          '++39 40 676 3903'
publ_contact_author_email        'dreos@univ.trieste.it'
publ_requested_journal           'Inorganic Chemistry'
publ_requested_coeditor_name              ?

publ_section_title

      'A New Dinuclear Complex Derived from Cobaloxime Units
       Held Together by a Pyridine-Boronic Acid.'

oop_
   _publ_author_name
   _publ_author_address

    'Renata Dreos'
    Dipartimento di Scienze Chimiche
    Universit\`a degli studi di Trieste
    I-34127 Trieste
    Italy
;
    'Giorgio Nardin'
    Dipartimento di Scienze Chimiche
    Universit\`a degli studi di Trieste
    I-34127 Trieste
    Italy
;
    'Lucio Randaccio'
    Dipartimento di Scienze Chimiche
    Universit\`a degli studi di Trieste
    I-34127 Trieste
    Italy
;
    'Giovanni Tauzher'
    Dipartimento di Scienze Chimiche
    Universit\`a degli studi di Trieste
    I-34127 Trieste
    Italy
;
    'Sara Vuano'
    Dipartimento di Scienze Chimiche
    Universit\`a degli studi di Trieste
    I-34127 Trieste
    Italy
 

-------------------------- data section of block ---------------------------
geom_bond_distance

                     CO    N1      1.872(7)   yes
                     CO    N2      1.862(8)   yes
                     CO    N3      1.868(7)   yes
                     CO    N4      1.872(6)   yes
                     CO    N5      2.068(7)   yes
                     CO    C14     1.99(1)    yes
                     CO    HO3     2.991(1)   yes
                     O1    N1      1.33(1)    yes
                     O1    HO3     0.950(7)   yes
                     O2    N2      1.34(1)    yes
                     O2    HO3     2.119(6)   yes
                     O3    N3      1.359(9)   yes
                     O3    B       1.51(1)    yes
                     O4    N4      1.36(1)    yes
                     O4    B       1.51(1)    yes
                     O5    C18     1.46(1)    yes
                     O5    B       1.44(1)    yes
                     N1    C2      1.32(1)    yes
                     N1    HO3     1.877(9)   yes
                     N2    C6      1.32(1)    yes
                     N2    HO3     2.780(7)   yes
                     N3    C3      1.30(1)    yes
                     N4    C7      1.30(1)    yes
                     N5    C9      1.34(1)    yes
                     N5    C13     1.34(1)    yes
                     C1    C2      1.49(1)    yes
                     C1    H11     0.95(1)    no
                     C1    H12     0.95(1)    no
                     C1    H13     0.95(1)    no
                     C2    C3      1.44(1)    yes
                     C3    C4      1.50(1)    yes
                     C4    H41     0.95(1)    no
                     C4    H42     0.95(1)    no
                     C4    H43     0.95(1)    no
                     C5    C6      1.47(1)    yes
                     C5    H51     0.95(1)    no
                     C5    H52     0.95(1)    no
                     C5    H53     0.95(1)    no
                     C6    C7      1.47(1)    yes
                     C7    C8      1.48(1)    yes
                     C8    H81     0.95(1)    no
                     C8    H82     0.95(1)    no
                     C8    H83     0.95(1)    no
                     C9    C10     1.39(1)    yes
                     C9    H91     0.950(8)   no
                     C10   C11     1.38(1)    yes
                     C11   C12     1.38(1)    yes
                     C11   H111    0.950(9)   no
                     C12   C13     1.36(1)    yes
                     C12   H121    0.950(9)   no
                     C13   HO3     2.830(9)   yes
                     C13   H131    0.95(1)    no
                     C14   H141    0.95(1)    no
                     C14   H142    0.95(1)    no
                     C14   H143    0.95(1)    no
                     O6    C15     1.44(1)    yes
                     O7    C16     1.44(1)    yes
                     O8    C17     1.21(3)    yes
                     O8    H151    0.95(2)    no
                     O8    H152    0.95(2)    no
                     O8    H153    0.95(2)    no
                     C17   H153    1.14(2)    no
                     HO3   H131    2.0400(1)  no


geom_angle


                      C14   CO    HO3      98.8(3)  yes
                      N5    CO    HO3      76.9(2)  yes
                      N5    CO    C14     175.4(4)  yes
                      N4    CO    HO3     144.6(3)  yes
                      N4    CO    C14      91.8(4)  yes
                      N4    CO    N5       90.9(3)  yes
                      N3    CO    HO3     116.5(2)  yes
                      N3    CO    C14      91.6(4)  yes
                      N3    CO    N5       91.9(3)  yes
                      N3    CO    N4       96.7(3)  yes
                      N2    CO    HO3      65.1(3)  yes
                      N2    CO    C14      85.8(4)  yes
                      N2    CO    N5       90.8(3)  yes
                      N2    CO    N4       82.3(3)  yes
                      N2    CO    N3      177.1(4)  yes
                      N1    CO    HO3      37.1(3)  yes
                      N1    CO    C14      86.4(4)  yes
                      N1    CO    N5       91.0(3)  yes
                      N1    CO    N4      177.8(4)  yes
                      N1    CO    N3       82.2(3)  yes
                      N1    CO    N2       98.8(4)  yes
                      N1    O1    HO3     109.5(7)  yes
                      N2    O2    HO3     104.6(5)  yes
                      N3    O3    B       117.0(7)  yes
                      N4    O4    B       117.3(6)  yes
                      C18   O5    B       117.6(8)  yes
                      CO    N1    O1      122.7(6)  yes
                      O1    N1    HO3      28.5(4)  yes
                      O1    N1    C2      121.5(7)  yes
                      CO    N1    HO3     105.9(4)  yes
                      CO    N1    C2      115.7(6)  yes
                      C2    N1    HO3     132.8(6)  yes
                      CO    N2    O2      123.0(6)  yes
                      O2    N2    HO3      47.5(4)  yes
                      O2    N2    C6      120.6(8)  yes
                      CO    N2    HO3      77.5(3)  yes
                      CO    N2    C6      116.4(7)  yes
                      C6    N2    HO3     161.4(7)  yes
                      CO    N3    O3      125.8(5)  yes
                      O3    N3    C3      117.4(7)  yes
                      CO    N3    C3      116.1(6)  yes
                      CO    N4    O4      125.3(5)  yes
                      O4    N4    C7      117.5(7)  yes
                      CO    N4    C7      117.0(6)  yes
                      CO    N5    C13     123.3(6)  yes
                      CO    N5    C9      120.4(6)  yes
                      C9    N5    C13     116.3(8)  yes
                      H12   C1    H13     109(1)    no
                      H11   C1    H13     109(1)    no
                      H11   C1    H12     109(1)    no
                      C2    C1    H13     109(1)    no
                      C2    C1    H12     109(1)    no
                      C2    C1    H11     109(1)    no
                      N1    C2    C1      121.5(9)  yes
                      C1    C2    C3      126.2(9)  yes
                      N1    C2    C3      112.3(8)  yes
                      N3    C3    C2      113.5(8)  yes
                      C2    C3    C4      123.3(8)  yes
                      N3    C3    C4      123.2(8)  yes
                      C3    C4    H43     109(1)    no
                      C3    C4    H42     109(1)    no
                      C3    C4    H41     109(1)    no
                      H42   C4    H43     109(1)    no
                      H41   C4    H43     109(1)    no
                      H41   C4    H42     109(1)    no
                      H52   C5    H53     109(1)    no
                      H51   C5    H53     109(1)    no
                      H51   C5    H52     109(1)    no
                      C6    C5    H53     109(1)    no
                      C6    C5    H52     109(1)    no
                      C6    C5    H51     109(1)    no
                      N2    C6    C5      124(1)    yes
                      C5    C6    C7      124.1(9)  yes
                      N2    C6    C7      112.2(9)  yes
                      N4    C7    C6      112.0(8)  yes
                      C6    C7    C8      123.8(9)  yes
                      N4    C7    C8      124.2(9)  yes
                      C7    C8    H83     109(1)    no
                      C7    C8    H82     109(1)    no
                      C7    C8    H81     109(1)    no
                      H82   C8    H83     109(1)    no
                      H81   C8    H83     109(1)    no
                      H81   C8    H82     109(1)    no
                      N5    C9    H91     117(1)    no
                      N5    C9    C10     125.6(8)  yes
                      C10   C9    H91     117(1)    no
                      C9    C10   C11     115.0(8)  yes
                      C10   C11   H111    119(1)    no
                      C10   C11   C12     121.1(9)  yes
                      C12   C11   H111    119(1)    no
                      C11   C12   H121    121(1)    no
                      C11   C12   C13     118.6(9)  yes
                      C13   C12   H121    121(1)    no
                      N5    C13   C12     123.3(9)  yes
                      C12   C13   H131    118(1)    no
                      C12   C13   HO3     139.3(7)  yes
                      N5    C13   H131    118(1)    no
                      N5    C13   HO3      94.7(6)  yes
                      HO3   C13   H131     28(0)    no
                      CO    C14   H143    109(1)    no
                      CO    C14   H142    109(1)    no
                      CO    C14   H141    109(1)    no
                      H142  C14   H143    109(1)    no
                      H141  C14   H143    109(1)    no
                      H141  C14   H142    109(1)    no
                      O4    B     O5      112.2(8)  yes
                      O3    B     O5      107.7(7)  yes
                      O3    B     O4      113.3(8)  yes
                      H152  O8    H153    109(2)    no
                      H151  O8    H153    109(2)    no
                      H151  O8    H152    109(2)    no
                      C17   O8    H153     62(2)    no
                      C17   O8    H152    150(2)    no
                      C17   O8    H151    100(2)    no
                      O8    C17   H153     48(1)    no
                      N2    HO3   C13      68.2(2)  yes
                      N1    HO3   C13      82.7(3)  yes
                      N1    HO3   N2       72.1(3)  yes
                      O2    HO3   C13      85.1(3)  yes
                      O2    HO3   N2       27.9(3)  yes
                      O2    HO3   N1       95.8(3)  yes
                      O1    HO3   C13     124.7(5)  yes
                      O1    HO3   N2       91.7(4)  yes
                      O1    HO3   N1       42.0(5)  yes
                      O1    HO3   O2      100.3(5)  yes
                      CO    HO3   C13      62.3(2)  yes
                      CO    HO3   N2       37.4(2)  yes
                      CO    HO3   N1       37.0(2)  yes
                      CO    HO3   O2       64.6(2)  yes
                      CO    HO3   O1       70.7(4)  yes
                      C13   HO3   H131     13(0)    no
                      N2    HO3   H131     70(0)    no
                      N1    HO3   H131     95(0)    no
                      O2    HO3   H131     82(0)    no
                      O1    HO3   H131    137(0)    no
                      CO    HO3   H131     72(0)    no
                      O8    H153  C17      70(2)    no
                      C13   H131  HO3     139(1)    no

chemical_name_systematic

....

chemical_formula_analytical       '                    '
chemical_formula_moiety           'C17.5 H34 B Co N5 O7.5'
chemical_formula_structural       '(CH3Co(C4H7N2O2)(C4H6BN2O2(C5H5N)(CH3O)))2'
                                   (CH3OH)5     
chemical_formula_sum              'C17.5 H34 B Co N5 O7.5'
           '
chemical_formula_weight                     504.2
chemical_melting_point                         ?


computing_data_collection              'CAD4'           
computing_cell_refinement              'CELDIM'
computing_data_reduction               'MOLEN (Enraf-Nonius)'
computing_structure_solution           'MOLEN (Enraf-Nonius)'
computing_structure_refinement         'MOLEN (Enraf-Nonius)'
computing_molecular_graphics           'ORTEP (Johnson)'
computing_publication_material         'PARST (Nardelli)'

cell_length_a                                 10.290(6)
cell_length_b                                 18.681(12)
cell_length_c                                 13.047(8)
cell_angle_alpha                              90.00
cell_angle_beta                               99.59(5)
cell_angle_gamma                              90.00
cell_volume                                   2473(2)
cell_formula_units_Z                          4.00
cell_measurement_temperature                  293
cell_measurement_radiation                    Mok\a
cell_measurement_wavelength                   0.71073
cell_measurement_reflns_used                  25
cell_measurement_theta_min                    10.5
cell_measurement_theta_max                    18.1

 
symmetry_cell_setting                       ' Monoclinic'
symmetry_space_group_name_H-M               ' P21/c   '
symmetry_space_group_name_Hall              '-P2yc'
symmetry_Int_Tables_number                  '14'


chemical_compound_source


exptl_crystal_colour                         yellow-orange
exptl_crystal_size_max                       0.40
exptl_crystal_size_mid                       0.30
exptl_crystal_size_min                       0.20
exptl_crystal_density_diffrn                 1.35
exptl_crystal_density_meas                   1.33
exptl_crystal_density_method                 flottation
exptl_crystal_F_000                          1325

exptl_absorpt_coefficient_mu                
exptl_absorpt_correction_type                '\y scan' 
exptl_absorpt_correction_T_min               0.826 
exptl_absorpt_correction_T_max               0.998


diffrn_special_details

......

diffrn_ambient_temperature                   293      
diffrn_radiation_wavelength                  0.7107300 diffrn_radiation_type                            MoK\a   
diffrn_radiation_source                      conventional   
diffrn_radiation_monochromator               graphite   
diffrn_radiation_detector                      
diffrn_measurement_device                    CAD-4
diffrn_measurement_method                    \w-2\Q   


diffrn_standards_number                      3  
diffrn_standards_interval_count              500
diffrn_standards_interval_time               4000 s
diffrn_standards_decay_%                     0

oop_
   _diffrn_standard_refln_index_h
   _diffrn_standard_refln_index_k
   _diffrn_standard_refln_index_l
    -1 1 -7   -1 -1 -7   0 -8 -5

oop_
   _diffrn_attenuator_code
   _diffrn_attenuator_scale
     17.8


diffrn_reflns_av_R_equivalents               0.033  
diffrn_reflns_limit_h_min                   -13
diffrn_reflns_limit_h_max                    13
diffrn_reflns_limit_k_min                     0
diffrn_reflns_limit_k_max                    23
diffrn_reflns_limit_l_min                     0
diffrn_reflns_limit_l_max                    16
diffrn_reflns_number                         5800
diffrn_reflns_theta_min                      2.11
diffrn_reflns_theta_max                      26.95
reflns_d_resolution_high                       ?

diffrn_reflns_reduction_process

.....


oop_
   _atom_type_symbol
   _atom_type_number_in_cell
   _atom_type_description
   _atom_type_scat_dispersion_real
   _atom_type_scat_dispersion_imag
   _atom_type_scat_source

   symbol  number  description    f'     f''     source
     Co       4    Cobalt       0.299  0.973   'IT.4  Tab.2.2A 2.3.1'
     O       30    Oxygen       0.008  0.006   'IT.4  Tab.2.2A 2.3.1'
     N       20    Nitrogen     0.004  0.003   'IT.4  Tab.2.2A 2.3.1'
     C       70    Carbon       0.002  0.002   'IT.4  Tab.2.2A 2.3.1'
     B        4    Boron        0.000  0.001   'IT.4  Tab.2.2A 2.3.1'
     H      132    Hydrogen     0.000  0.000   'IT.4  Tab.2.2C      '


oop_
   _atom_site_label
   _atom_site_fract_x
   _atom_site_fract_y
   _atom_site_fract_z
   _atom_site_U_iso_or_equiv
   _atom_site_thermal_displace_type
   _atom_site_type_symbol
   _atom_site_calc_flag
   _atom_site_calc_attached_atom
   _atom_site_aniso_ratio

  R=Rmax./Rmin.=ratio of the maximum and minimum
                principal axes of atomic displacement ellipsoids

                     Table of coordinates
                     --------------------

label    x/a         y/b         z/c        Ueq       tmf  typ calc att   R

CO     0.1691(1)   0.01732(8)  0.2737(1)  0.0330(3)  aniso Co  .   .     1.67
O1     0.4187(6)   0.0587(4)   0.2313(6)  0.0561(25) aniso O   .   .     3.45
O2     0.2289(7)   0.1281(4)   0.1412(5)  0.0548(23) aniso O   .   .     3.01
O3     0.1097(5)  -0.0943(3)   0.4111(5)  0.0357(19) aniso O   .   .     2.40
O4    -0.0848(5)  -0.0244(4)   0.3183(5)  0.0354(19) aniso O   .   .     1.40
O5    -0.0315(6)  -0.1452(4)   0.2663(5)  0.0433(22) aniso O   .   .     2.08
N1     0.3528(7)   0.0149(5)   0.2849(6)  0.0445(25) aniso N   .   .     2.71
N2     0.1339(8)   0.0921(5)   0.1787(6)  0.0428(27) aniso N   .   .     1.43
N3     0.2008(6)  -0.0608(4)   0.3637(6)  0.0326(25) aniso N   .   .     3.12
N4    -0.0149(7)   0.0162(5)   0.2607(5)  0.0332(23) aniso N   .   .     1.43
N5     0.1828(6)   0.0884(4)   0.3966(6)  0.0312(21) aniso N   .   .     2.12
C1     0.5596(9)  -0.0439(7)   0.3612(10) 0.0620(44) aniso C   .   .     4.12
C2     0.4134(8)  -0.0351(6)   0.3463(8)  0.0399(32) aniso C   .   .     2.70
C3     0.3235(9)  -0.0773(5)   0.3944(7)  0.0370(29) aniso C   .   .     1.71
C4     0.3672(10) -0.1344(7)   0.4732(9)  0.0544(38) aniso C   .   .     2.83
C5    -0.0368(11)  0.1643(6)   0.0712(8)  0.0528(37) aniso C   .   .     1.92
C6     0.0087(10)  0.1077(6)   0.1473(8)  0.0433(33) aniso C   .   .     1.53
C7    -0.0796(9)   0.0626(5)   0.1975(7)  0.0397(31) aniso C   .   .     1.62
C8    -0.2247(10)  0.0698(7)   0.1789(9)  0.0568(39) aniso C   .   .     3.15
C9     0.1197(8)   0.0752(5)   0.4767(7)  0.0313(26) aniso C   .   .     3.15
C10    0.1162(8)   0.1203(5)   0.5606(7)  0.0308(24) aniso C   .   .     1.79
C11    0.1887(9)   0.1824(5)   0.5601(7)  0.0345(30) aniso C   .   .     1.99
C12    0.2585(9)   0.1969(5)   0.4809(8)  0.0405(31) aniso C   .   .     4.72
C13    0.2526(8)   0.1491(5)   0.4015(7)  0.0363(30) aniso C   .   .     2.85
C14    0.1642(10) -0.0453(6)   0.1502(8)  0.0510(36) aniso C   .   .     1.72
C18   -0.1499(12) -0.1465(7)   0.1870(10) 0.0697(49) aniso C   .   .     3.46
B     -0.0300(10) -0.0972(6)   0.3523(9)  0.0350(34) aniso B   .   .     2.45
O6     0.8380(8)   0.2387(5)   0.7592(7)  0.0578(20) iso   O   .   .     0.00
O7     0.5845(10)  0.2036(6)   0.7667(8)  0.0750(25) iso   O   .   .     0.00
O8     0.5255(20)  0.1652(12)  0.9627(15) 0.0747(50) iso   O   .   .     0.00
C15    0.8870(13)  0.2825(8)   0.8484(10) 0.0585(31) iso   C   .   .     0.00
C16    0.5132(16)  0.2673(9)   0.7295(12) 0.0735(38) iso   C   .   .     0.00
C17    0.4838(20)  0.1048(12)  0.9659(16) 0.0358(42) iso   C   .   .     0.00
HO3    0.40276(0)  0.10689(0)  0.24874(0) 0.0576(0)  iso   H  calc .     0.00
H11    0.59591(0) -0.00934(0)  0.32072(0) 0.0637(0)  iso   H  calc C1    1.00
H12    0.59557(0) -0.03747(0)  0.43255(0) 0.0637(0)  iso   H  calc C1    1.00
H13    0.58031(0) -0.09060(0)  0.33994(0) 0.0637(0)  iso   H  calc C1    1.00
H41    0.29228(0) -0.15551(0)  0.49475(0) 0.0558(0)  iso   H  calc C4    1.00
H42    0.41511(0) -0.16998(0)  0.44319(0) 0.0558(0)  iso   H  calc C4    1.00
H43    0.42206(0) -0.11382(0)  0.53153(0) 0.0558(0)  iso   H  calc C4    1.00
H51    0.03707(0)  0.18640(0)  0.04930(0) 0.0542(0)  iso   H  calc C5    1.00
H52   -0.09194(0)  0.14396(0)  0.01284(0) 0.0542(0)  iso   H  calc C5    1.00
H53   -0.08506(0)  0.19917(0)  0.10240(0) 0.0542(0)  iso   H  calc C5    1.00
H81   -0.26166(0)  0.03538(0)  0.21924(0) 0.0583(0)  iso   H  calc C8    1.00
H82   -0.24798(0)  0.11656(0)  0.19829(0) 0.0583(0)  iso   H  calc C8    1.00
H83   -0.25771(0)  0.06230(0)  0.10732(0) 0.0583(0)  iso   H  calc C8    1.00
H151   0.61714(0)  0.15558(0)  0.96930(0) 0.0972(0)  iso   H  calc O8    1.00
H152   0.51045(0)  0.21503(0)  0.95224(0) 0.0972(0)  iso   H  calc O8    1.00
H153   0.49493(0)  0.15065(0)  1.02433(0) 0.0972(0)  iso   H  calc O8    1.00
H141   0.07521(0) -0.05594(0)  0.12171(0) 0.0524(0)  iso   H  calc C14   1.00
H142   0.20492(0) -0.02150(0)  0.09962(0) 0.0524(0)  iso   H  calc C14   1.00
H143   0.21009(0) -0.08857(0)  0.17030(0) 0.0524(0)  iso   H  calc C14   1.00
H91    0.07333(0)  0.03119(0)  0.47588(0) 0.0321(0)  iso   H  calc C9    1.00
H111   0.19053(0)  0.21583(0)  0.61519(0) 0.0354(0)  iso   H  calc C11   1.00
H121   0.30962(0)  0.23928(0)  0.48170(0) 0.0416(0)  iso   H  calc C12   1.00
H131   0.30031(0)  0.15935(0)  0.34689(0) 0.0372(0)  iso   H  calc C13   1.00
oop_
   _atom_site_aniso_label
   _atom_site_aniso_U_11
   _atom_site_aniso_U_22
   _atom_site_aniso_U_33
   _atom_site_aniso_U_12
   _atom_site_aniso_U_13
   _atom_site_aniso_U_23

label   U11         U22         U33         U23         U13         U12

O    0.0199(3)   0.0293(4)   0.0296(4)   0.0025(6)   0.0059(3)  -0.0005(6)
1    0.0298(25)  0.0445(36)  0.0631(35)  0.0089(32)  0.0208(24) -0.0047(27)
2    0.0408(30)  0.0484(37)  0.0436(31)  0.0144(29)  0.0155(24) -0.0089(29)
3    0.0174(22)  0.0297(28)  0.0364(28)  0.0061(24)  0.0014(21) -0.0017(22)
4    0.0231(21)  0.0291(28)  0.0315(25)  0.0000(25)  0.0045(19) -0.0017(24)
5    0.0287(27)  0.0350(31)  0.0388(30) -0.0128(26)  0.0052(23) -0.0009(25)
1    0.0253(27)  0.0423(38)  0.0413(33) -0.0036(37)  0.0155(24) -0.0055(34)
2    0.0339(33)  0.0336(38)  0.0354(35)  0.0020(32)  0.0105(28) -0.0025(31)
3    0.0140(24)  0.0302(35)  0.0348(32)  0.0015(29)  0.0093(22)  0.0023(25)
4    0.0233(26)  0.0266(29)  0.0280(29)  0.0035(31)  0.0018(23) -0.0012(31)
5    0.0180(25)  0.0248(32)  0.0319(31)  0.0043(28)  0.0061(23) -0.0022(25)
1    0.0182(35)  0.0621(68)  0.0680(62)  0.0029(55)  0.0109(39)  0.0022(42)
2    0.0176(31)  0.0376(51)  0.0402(42) -0.0033(37)  0.0075(30)  0.0036(32)
3    0.0252(34)  0.0282(42)  0.0355(40) -0.0007(35)  0.0090(30)  0.0035(34)
4    0.0245(38)  0.0539(59)  0.0506(52)  0.0159(47)  0.0067(37)  0.0036(42)
5    0.0461(50)  0.0404(52)  0.0373(46)  0.0116(42)  0.0036(41)  0.0008(46)
6    0.0418(44)  0.0321(45)  0.0283(40)  0.0019(37)  0.0049(35)  0.0011(41)
7    0.0328(39)  0.0288(43)  0.0304(41) -0.0036(37) -0.0006(34)  0.0044(37)
8    0.0254(40)  0.0501(59)  0.0556(58)  0.0104(50) -0.0031(42)  0.0078(43)
9    0.0165(29)  0.0204(36)  0.0378(39)  0.0043(33)  0.0060(27) -0.0045(30)
10   0.0187(31)  0.0218(37)  0.0314(39) -0.0018(33)  0.0012(29)  0.0002(31)
11   0.0208(34)  0.0249(40)  0.0336(41)  0.0005(35) -0.0020(32) -0.0005(33)
12   0.0254(35)  0.0195(38)  0.0512(50)  0.0017(36)  0.0066(35) -0.0106(32)
13   0.0171(31)  0.0316(43)  0.0370(41)  0.0100(35)  0.0039(30) -0.0028(32)
14   0.0403(45)  0.0492(56)  0.0327(43) -0.0037(42)  0.0102(36)  0.0017(44)
18   0.0402(52)  0.0673(72)  0.0521(59) -0.0230(53) -0.0081(48) -0.0045(53)
     0.0169(36)  0.0277(47)  0.0369(48) -0.0052(42)  0.0004(35)  0.0001(37)


refine_special_details

.....

refine_ls_structure_factor_coef               'F'
refine_ls_matrix_type                          full
refine_ls_weighting_scheme                     1/(\s^2^(F) + (0.20F) ^2^ + 1.0)

refine_ls_hydrogen_treatment                   noref
refine_ls_extinction_method                    ?
refine_ls_extinction_coef                      ?
refine_ls_number_reflns                        2297
reflns_observed_criterion                      I\s(I)
refine_ls_number_parameters                    268
refine_ls_number_restraints                    ?
refine_ls_number_constraints                   ?
refine_ls_R_factor_all                         ?
refine_ls_R_factor_obs                         0.071
refine_ls_wR_factor_obs                        0.086
refine_ls_goodness_of_fit_obs                  0.43
refine_ls_shift/esd_max                        ?
refine_ls_shift/esd_mean                       ?
refine_diff_density_min                        ?
refine_diff_density_max                        ?


oop_
geom_contact_atom_site_label_1
geom_contact_atom_site_label_2
geom_contact_distance

   This is the complete list of first-neighbour intramolecular distances
   less than 3.0 Angstrom for non-H atoms.

     lab1    lab2        distance

     CO      O1          2.824(7)
     CO      O2          2.828(7)
     CO      O3          2.882(6)
     CO      O4          2.878(6)
     CO      C2          2.717(8)
     CO      C3          2.701(9)
     CO      C6          2.718(9)
     CO      C7          2.721(9)
     CO      C9          2.983(9)
     O1      O2          2.472(9)
     O1      N2          2.963(10)
     O1      C1          2.798(13)
     O1      C2          2.313(12)
     O2      N1          2.968(10)
     O2      C5          2.818(12)
     O2      C6          2.311(12)
     O3      O4          2.524(8)
     O3      O5          2.382(8)
     O3      N4          2.987(9)
     O3      C4          2.743(11)
     O4      O5          2.445(9)
     O4      N3          2.979(8)
     O4      C8          2.758(12)
     O4      C18         2.863(14)
     O5      N3          2.967(9)
     N1      N2          2.834(10)
     N1      N3          2.458(11)
     N1      N5          2.814(11)
     N1      C1          2.454(12)
     N1      C14         2.642(12)
     N2      N4          2.458(11)
     N2      N5          2.804(10)
     N2      C5          2.461(13)
     N2      C7          2.317(12)
     N2      C14         2.620(14)
     N3      N4          2.794(9)
     N3      N5          2.832(10)
     N3      C4          2.459(12)
     N3      C14         2.763(12)
     N3      B           2.450(12)
     N4      N5          2.811(9)
     N4      C6          2.300(13)
     N4      C8          2.457(12)
     N4      C14         2.771(13)
     N4      B           2.449(14)
     N5      C10         2.427(12)
     N5      C11         2.756(12)
     N5      C12         2.374(11)
     C1      C3          2.614(14)
     C2      C4          2.582(15)
     C5      C7          2.601(15)
     C6      C8          2.602(15)
     C9      C11         2.332(12)
     C9      C12         2.680(12)
     C10     C12         2.404(13)
     C10     C13         2.745(13)
     C11     C13         2.356(14)
     C18     B           2.477(16)
     O6      O7          2.707(13)
     O7      O8          2.819(23)
